# Supplementary material for: 64Cu-DOTHA2-PSMA, a Novel PSMA PET Radiotracer for Prostate Cancer with a Long Imaging Time Window
Source: MDPI journal article supplement (doi:10.3390/ph15080996), 2022-08-13
Supplement: s1 [file s1]

## SUPPLEMENTAL MATERIAL

### **<sup>64</sup>Cu-DOTHA<sub>2</sub>-PSMA, a novel PSMA PET radiotracer for prostate cancer with a long imaging time window**

Marie-Christine Milot, Ophélie Bélessant Benesty, Véronique Dumulon-Perreault, Samia Ait-Mohand, Patrick O. Richard, Etienne Rousseau, Brigitte Guérin\*

#### **Table of content**

|                                                                                                                                                                                                                                                                                                                        |            |
|------------------------------------------------------------------------------------------------------------------------------------------------------------------------------------------------------------------------------------------------------------------------------------------------------------------------|------------|
| <b>Code for cellular assays and dynamic PET statistics.....</b>                                                                                                                                                                                                                                                        | <b>S2</b>  |
| <b>Figure S1.</b> <sup>1</sup> H-NMR spectrum of DOTHA <sub>2</sub> (OtBu) <sub>3</sub> .....                                                                                                                                                                                                                          | <b>S2</b>  |
| <b>Figure S2.</b> <sup>13</sup> C-NMR spectrum of DOTHA <sub>2</sub> (OtBu) <sub>3</sub> .....                                                                                                                                                                                                                         | <b>S3</b>  |
| <b>Figure S3.</b> HPLC chromatogram of DOTHA <sub>2</sub> -PSMA.....                                                                                                                                                                                                                                                   | <b>S3</b>  |
| <b>Figure S4.</b> ESI-MS spectrum of DOTHA <sub>2</sub> -PSMA.....                                                                                                                                                                                                                                                     | <b>S4</b>  |
| <b>Figure S5.</b> HPLC of <sup>nat</sup> Cu-DOTHA <sub>2</sub> -PSMA.....                                                                                                                                                                                                                                              | <b>S4</b>  |
| <b>Figure S6.</b> ESI-MS of <sup>nat</sup> Cu-DOTHA <sub>2</sub> -PSMA.....                                                                                                                                                                                                                                            | <b>S5</b>  |
| <b>Figure S7.</b> UPLC for A) <sup>64</sup> Cu-DOTHA <sub>2</sub> -PSMA (standard), B) <sup>64</sup> Cu(OAc) <sub>2</sub> and C) <sup>64</sup> Cu-DOTHA <sub>2</sub> -PSMA in the supernatant fraction after 24 h <i>ex vivo</i> incubation in mice plasma .....                                                       | <b>S5</b>  |
| <b>Figure S8.</b> Radio-TLC for A) <sup>64</sup> Cu-DOTHA <sub>2</sub> -PSMA, B) <sup>64</sup> Cu(OAc) <sub>2</sub> , C) <sup>64</sup> Cu-DOTHA <sub>2</sub> -PSMA in the plasma supernatant of blood sampled 1h after <sup>64</sup> Cu-DOTHA <sub>2</sub> -PSMA injection in mice .....                               | <b>S6</b>  |
| <b>Figure S9.</b> Standard (A) and radioactive (B) HPLC chromatogram for <sup>68</sup> Ga-PSMA-617.....                                                                                                                                                                                                                | <b>S6</b>  |
| <b>Figure S10.</b> <i>In vivo</i> stability results after injection of <sup>64</sup> Cu-DOTHA <sub>2</sub> -PSMA in balb/c mice: (A) UPLC for urine collected 1h p.i. of <sup>64</sup> Cu-DOTHA <sub>2</sub> -PSMA and (B) radio-TLC for mice liver extract 2h p.i. of <sup>64</sup> Cu-DOTHA <sub>2</sub> -PSMA ..... | <b>S7</b>  |
| <b>Table S1.</b> Cellular uptake and internalization detailed results .....                                                                                                                                                                                                                                            | <b>S8</b>  |
| <b>Table S2.</b> Cellular efflux detailed results .....                                                                                                                                                                                                                                                                | <b>S9</b>  |
| <b>Table S3.</b> Linear model for <sup>64</sup> Cu-DOTHA <sub>2</sub> -PSMA and <sup>68</sup> Ga-PSMA-617 uptake in LNCaP cells. ....                                                                                                                                                                                  | <b>S10</b> |
| <b>Table S4.</b> Linear model for <sup>64</sup> Cu-DOTHA <sub>2</sub> -PSMA and <sup>68</sup> Ga-PSMA-617 internalization in LNCaP cells.....                                                                                                                                                                          | <b>S10</b> |
| <b>Table S5.</b> Linear model for <sup>64</sup> Cu-DOTHA <sub>2</sub> -PSMA and <sup>68</sup> Ga-PSMA-617 efflux in LNCaP cells.. ....                                                                                                                                                                                 | <b>S10</b> |
| <b>Table S6.</b> Balb/c mice biodistribution detailed results .....                                                                                                                                                                                                                                                    | <b>S11</b> |
| <b>Table S7.</b> Detailed results for PET region-of-interest activity for non-blocked injection of <sup>64</sup> Cu-DOTHA <sub>2</sub> -PSMA .....                                                                                                                                                                     | <b>S12</b> |
| <b>Table S8.</b> Detailed results for PET region-of-interest activity for injection of <sup>64</sup> Cu-DOTHA <sub>2</sub> -PSMA blocked with <sup>nat</sup> Cu-DOTHA <sub>2</sub> -PSMA .....                                                                                                                         | <b>S13</b> |
| <b>Table S9.</b> Linear model for <sup>64</sup> Cu-DOTHA <sub>2</sub> -PSMA tumor uptake in dynamic PET .....                                                                                                                                                                                                          | <b>S13</b> |
| <b>Table S10.</b> Tumor-to-organs of interest ratios for <sup>64</sup> Cu-DOTHA <sub>2</sub> -PSMA PET imaging .....                                                                                                                                                                                                   | <b>S14</b> |

|                                                                                 |     |
|---------------------------------------------------------------------------------|-----|
| <b>Table S11.</b> Tumor bearing NRG mice biodistribution detailed results ..... | S14 |
|---------------------------------------------------------------------------------|-----|

### Code for cellular assays and dynamic PET statistics.

To assess statistical significance in cellular assays ( $^{64}\text{Cu}$ -DOTHA<sub>2</sub>-PSMA vs.  $^{68}\text{Ga}$ -PSMA-617) and dynamic PET (blocked vs. non blocked injection), a linear model in R was used with evaluation of residuals (R x64 4.1.1, libraries: readxl, lme4). A Python script was used to produce graphs to visually analyse the model. Spyder 4 (anaconda3) was used as well as a Python 3.8 program.

```
#R pseudo-code
Model = lm("uptake ~ time + radiotracer")
Summary(model)

#add to the data the predictions from each model and residuals when available
datap = cbind(data, prediction = predict(model),
              prediction_residuals = model$residuals)
```

**Figure S1.**  $^1\text{H}$ -NMR spectrum of DOTHA<sub>2</sub>(OtBu)<sub>3</sub>

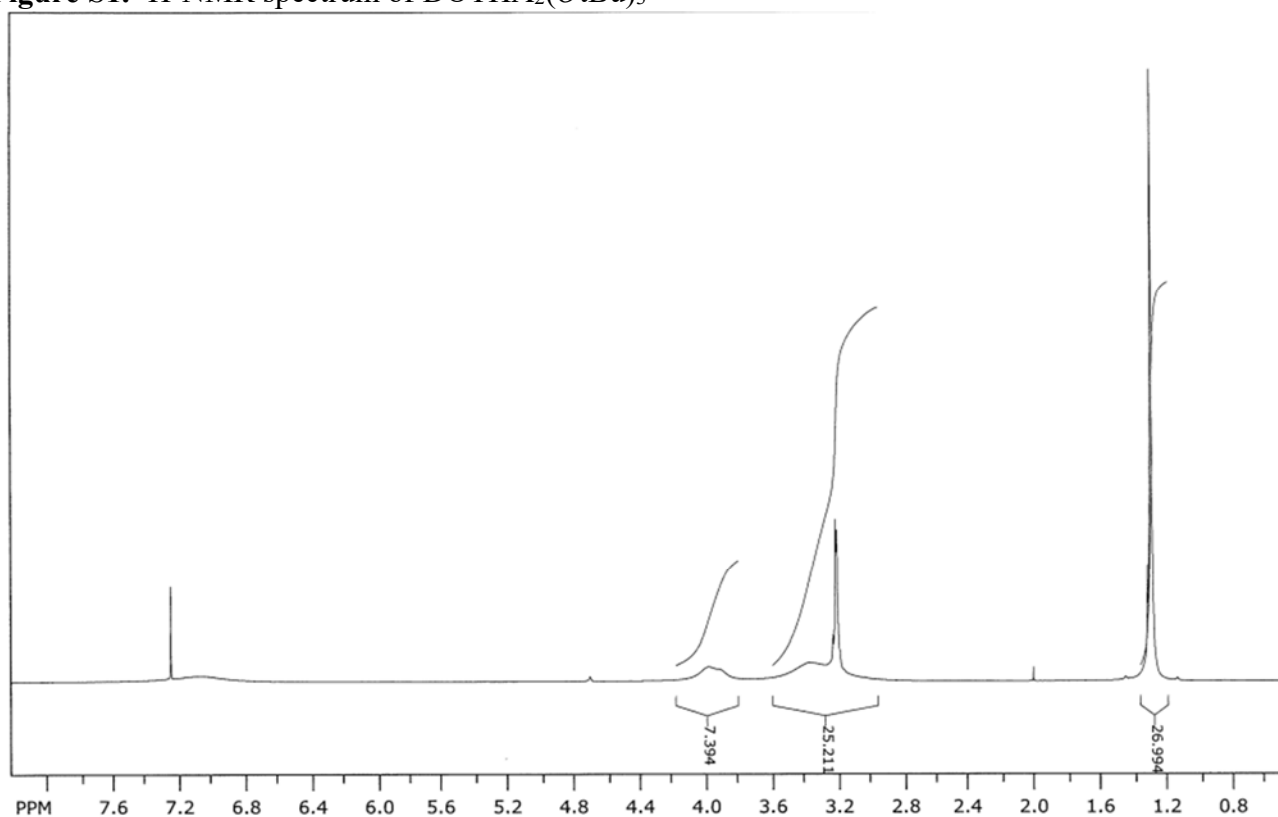

**Figure S2.**  $^{13}\text{C}$ -NMR spectrum of  $\text{DOTHA}_2(\text{OtBu})_3$

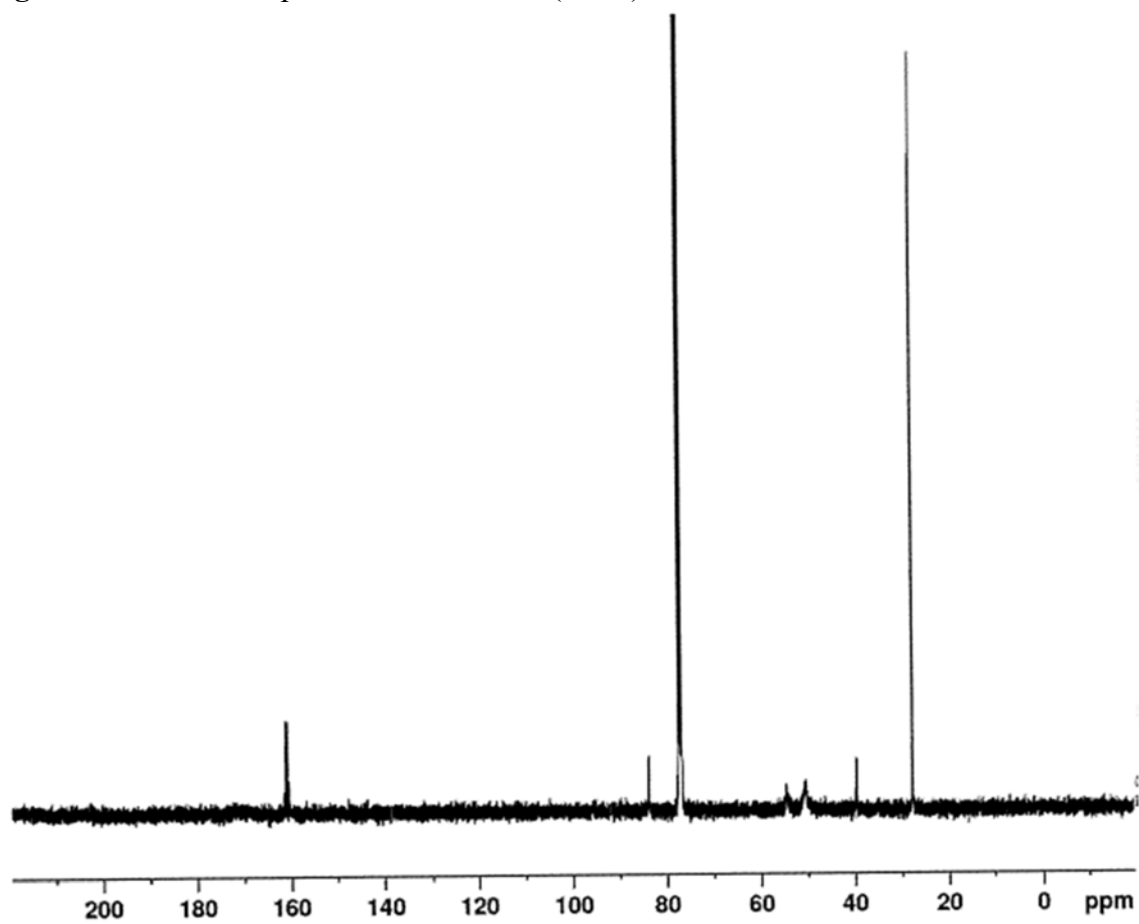

**Figure S3.** HPLC chromatogram of  $\text{DOTHA}_2\text{-PSMA}$

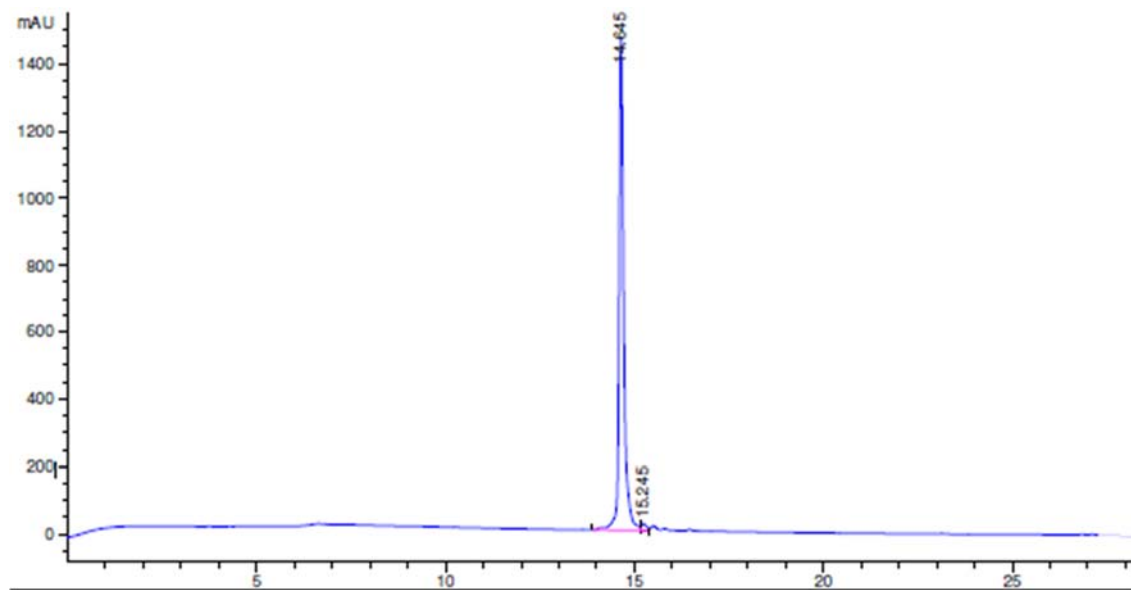

**Figure S4.** ESI-MS spectrum of DOTA<sub>2</sub>-PSMA

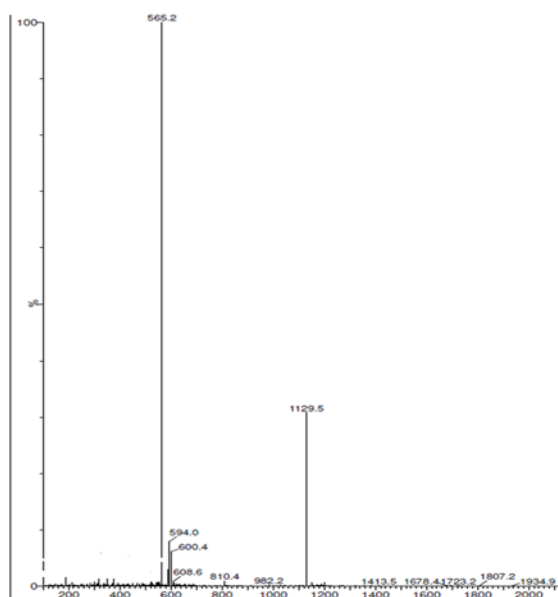

**Figure S5.** HPLC of <sup>nat</sup>Cu-DOTA<sub>2</sub>-PSMA

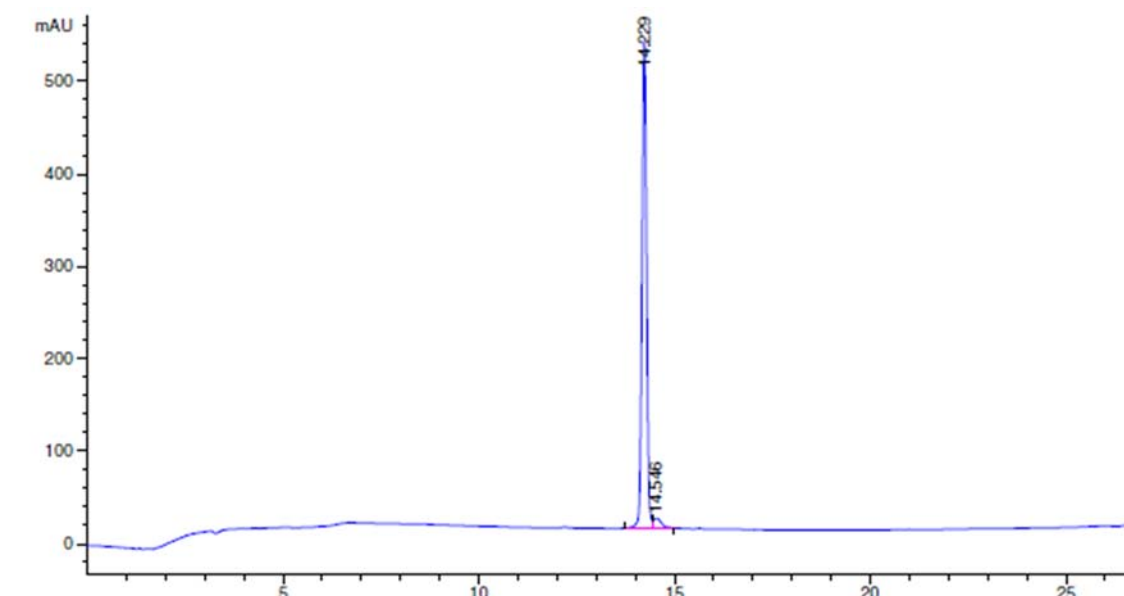

**Figure S6.** ESI-MS of  $^{nat}\text{Cu}$ -DOTHA<sub>2</sub>-PSMA

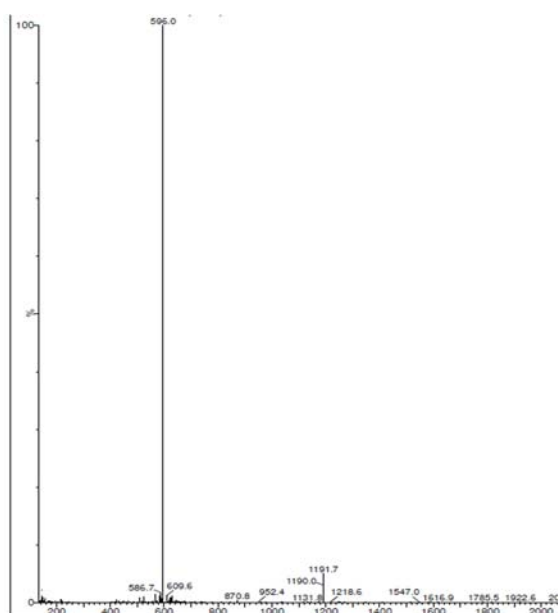

**Figure S7.** UPLC for A)  $^{64}\text{Cu}$ -DOTHA<sub>2</sub>-PSMA (standard), B)  $^{64}\text{Cu}(\text{OAc})_2$  and C)  $^{64}\text{Cu}$ -DOTHA<sub>2</sub>-PSMA in the supernatant fraction after 24 h *ex vivo* incubation in mice plasma

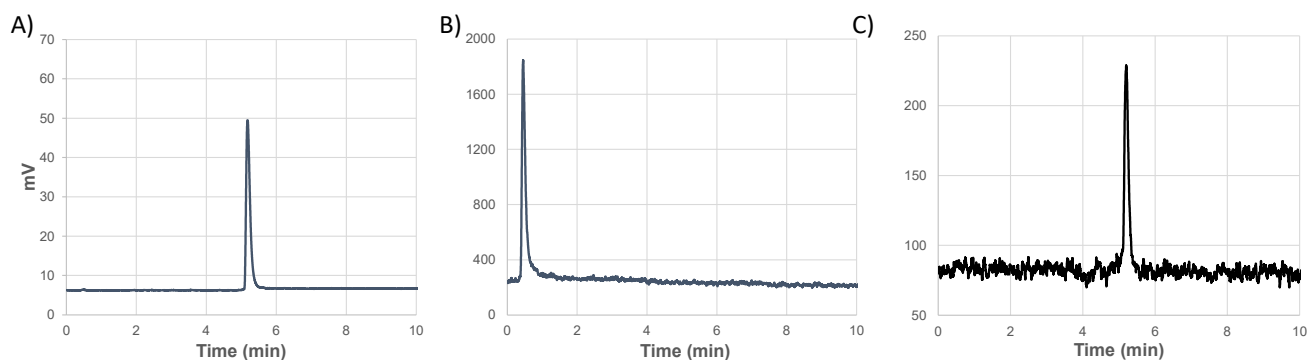

In C,  $^{64}\text{Cu}$ -DOTHA<sub>2</sub>-PSMA was incubated in mouse plasma for 24h and the plasma supernatant was analysed by UPLC. In the plasma supernatant, less than 3% of the signal was free  $^{64}\text{Cu}$ , which corresponded to 1.28% of the total plasmatic signal (supernatant plus pellet).

**Figure S8.** Radio-TLC for A)  $^{64}\text{Cu}$ -DOTHA<sub>2</sub>-PSMA, B)  $^{64}\text{Cu}(\text{OAc})_2$ , C)  $^{64}\text{Cu}$ -DOTHA<sub>2</sub>-PSMA in the plasma supernatant of blood sampled 1h after  $^{64}\text{Cu}$ -DOTHA<sub>2</sub>-PSMA injection in mice

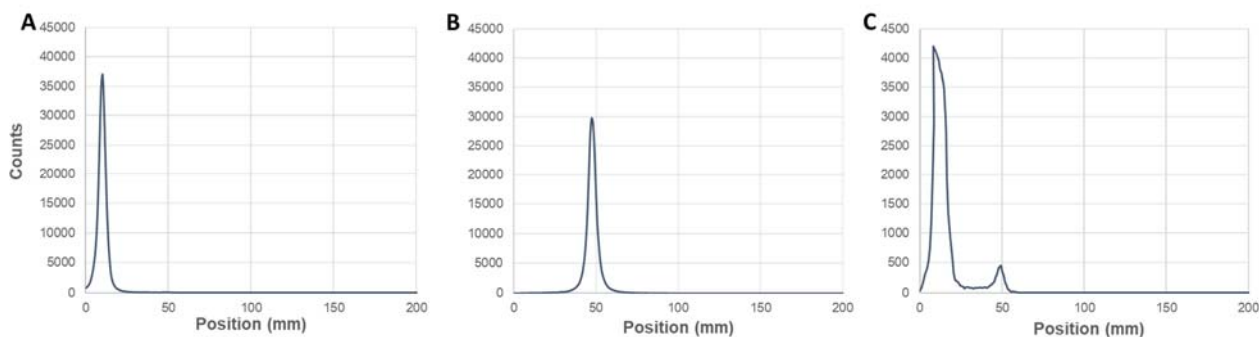

In C, mice were injected with  $^{64}\text{Cu}$ -DOTHA<sub>2</sub>-PSMA and plasma was sampled 1h after the injection to be analyzed by radio-TLC. The plasma supernatant showed a 5% peak from free  $^{64}\text{Cu}$ , which corresponded to 2.60% of the total plasma signal (supernatant plus pellet). A larger peak is observed for  $^{64}\text{Cu}$ -DOTHA<sub>2</sub>-PSMA, which may correspond to the tracer alone and bound to plasma protein.

**Figure S9.** Standard (A) and radioactive (B) HPLC chromatogram for  $^{68}\text{Ga}$ -PSMA-617

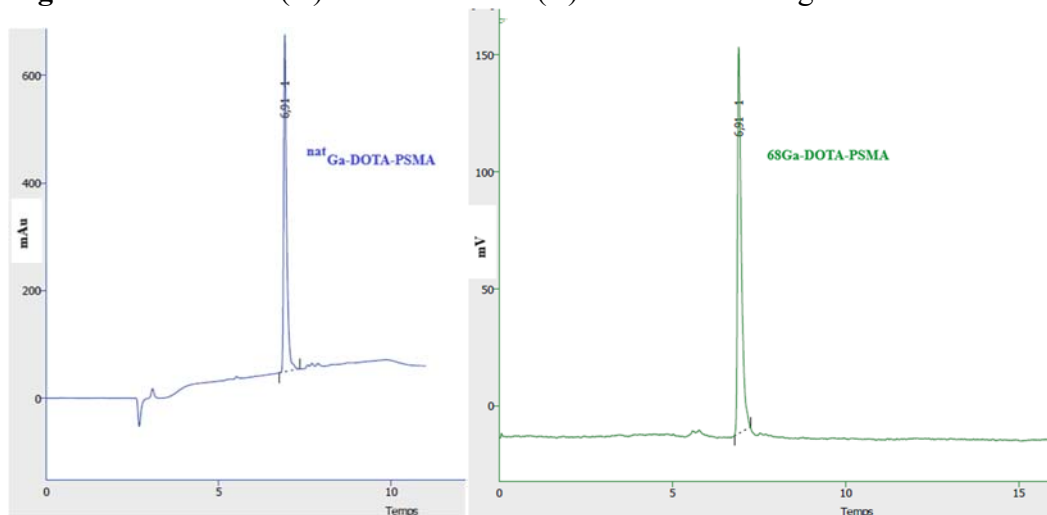

**Figure S10.** *In vivo* stability results after injection of  $^{64}\text{Cu}$ -DOTHA<sub>2</sub>-PSMA in balb/c mice: (A) UPLC for urine collected 1h p.i. of  $^{64}\text{Cu}$ -DOTHA<sub>2</sub>-PSMA and (B) radio-TLC for mice liver extract 2h p.i. of  $^{64}\text{Cu}$ -DOTHA<sub>2</sub>-PSMA

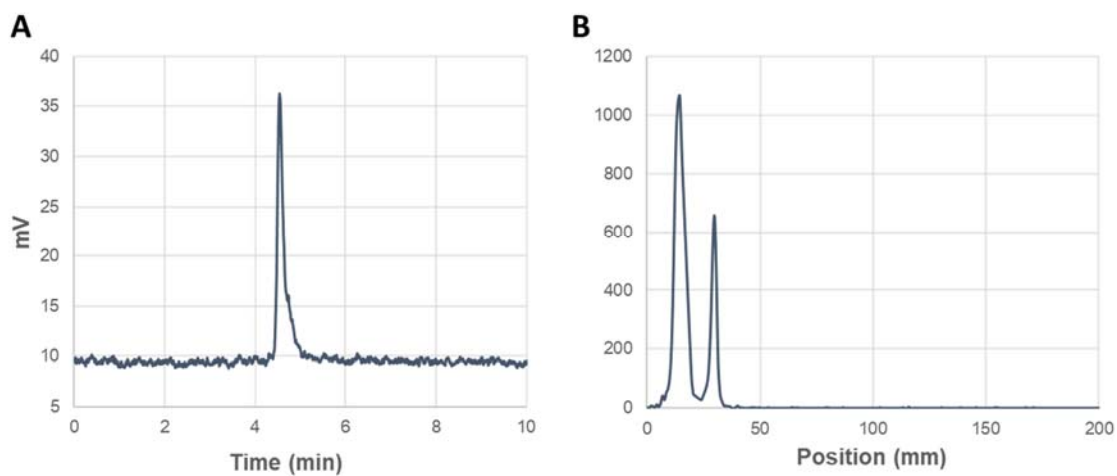

**Table S1.** Cellular uptake and internalization detailed results

| Time p.i.<br>(h) | Uptake                                                                             |   |                                                                    |   | Internalization                                                                                   |   |                                                                                   |   |
|------------------|------------------------------------------------------------------------------------|---|--------------------------------------------------------------------|---|---------------------------------------------------------------------------------------------------|---|-----------------------------------------------------------------------------------|---|
|                  | <sup>64</sup> Cu-DOTHA <sub>2</sub> -PSMA<br>Uptake<br>(%IA/10 <sup>6</sup> cells) | n | <sup>68</sup> Ga-PSMA-617<br>Uptake<br>(%IA/10 <sup>6</sup> cells) | n | <sup>64</sup> Cu-DOTHA <sub>2</sub> -PSMA<br>Internalized activity<br>(%IA/10 <sup>6</sup> cells) | n | <sup>68</sup> Ga-PSMA-617<br>Internalized activity<br>(%IA/10 <sup>6</sup> cells) | n |
| 0.25             | 15.39 ± 9.57                                                                       | 5 | 0.00 ± 0.00                                                        | 3 | 1.68 ± 1.04                                                                                       | 4 | 0.00 ± 0.00                                                                       | 3 |
| 0.5              | 25.09 ± 14.65                                                                      | 5 | 5.92 ± 2.20                                                        | 3 | 2.07 ± 0.64                                                                                       | 4 | 1.02 ± 0.40                                                                       | 3 |
| 0.75             | 22.79 ± 14.06                                                                      | 5 | 8.50 ± 2.31                                                        | 3 | 2.34 ± 0.51                                                                                       | 4 | 1.81 ± 0.95                                                                       | 3 |
| 1                | 24.73 ± 17.29                                                                      | 5 | 9.44 ± 2.73                                                        | 3 | 2.61 ± 0.99                                                                                       | 4 | 2.92 ± 1.49                                                                       | 3 |
| 2                | 30.24 ± 9.65                                                                       | 5 | 11.44 ± 3.14                                                       | 3 | 12.25 ± 6.69                                                                                      | 4 | 4.38 ± 2.05                                                                       | 3 |
| 3                | 32.70 ± 11.85                                                                      | 5 | 13.20 ± 2.18                                                       | 3 | 14.84 ± 5.86                                                                                      | 4 | 7.90 ± 2.21                                                                       | 3 |
| 4                | 27.57 ± 14.04                                                                      | 9 |                                                                    |   | 14.18 ± 6.51                                                                                      | 6 |                                                                                   |   |
| 8                | 21.98 ± 8.79                                                                       | 4 |                                                                    |   | 13.10 ± 4.62                                                                                      | 2 |                                                                                   |   |
| 12               | 23.39 ± 9.45                                                                       | 4 |                                                                    |   | 15.66 ± 4.76                                                                                      | 2 |                                                                                   |   |
| 24               | 25.66 ± 12.08                                                                      | 4 |                                                                    |   | 16.45 ± 6.97                                                                                      | 2 |                                                                                   |   |
| 36               | 29.62 ± 14.01                                                                      | 4 |                                                                    |   | 25.43 ± 1.53                                                                                      | 2 |                                                                                   |   |
| 48               | 34.48 ± 13.60                                                                      | 4 |                                                                    |   | 34.13 ± 4.87                                                                                      | 2 |                                                                                   |   |



**Table S2.** Cellular efflux detailed results

| Time p.i. (h)        | Efflux                                                                                     |   |                                                                            |   |
|----------------------|--------------------------------------------------------------------------------------------|---|----------------------------------------------------------------------------|---|
|                      | <sup>64</sup> Cu-DOTHA <sub>2</sub> -PSMA<br>Retained activity<br>normalized to time 0 (%) | n | <sup>68</sup> Ga-PSMA-617<br>Retained activity<br>normalized to time 0 (%) | n |
| <i>1h incubation</i> |                                                                                            |   |                                                                            |   |
| 0                    | 100%                                                                                       |   | 100%                                                                       |   |
| 0.25                 | 100.93 ± 9.46                                                                              | 4 | 101.57 ± 3.64                                                              | 3 |
| 0.50                 | 105.51 ± 6.55                                                                              | 5 | 106.07 ± 13.23                                                             | 3 |
| 0.75                 | 94.38 ± 20.10                                                                              | 5 | 97.22 ± 13.20                                                              | 3 |
| 1                    | 77.52 ± 39.73                                                                              | 5 | 84.75 ± 28.12                                                              | 3 |
| 2                    | 80.95 ± 34.22                                                                              | 5 | 81.62 ± 20.16                                                              | 3 |
| 3                    | 76.53 ± 30.57                                                                              | 5 |                                                                            |   |
| 4                    | 64.04 ± 32.06                                                                              | 5 |                                                                            |   |
| <i>4h incubation</i> |                                                                                            |   |                                                                            |   |
| 4                    | 66.23 ± 15.08                                                                              | 4 |                                                                            |   |
| 8                    | 51.88 ± 11.85                                                                              | 4 |                                                                            |   |
| 24                   | 35.10 ± 13.51                                                                              | 4 |                                                                            |   |
| 32                   | 34.27 ± 5.14                                                                               | 4 |                                                                            |   |
| 48                   | 48.61 ± 6.72                                                                               | 4 |                                                                            |   |

**Table S3.** Linear model for  $^{64}\text{Cu}$ -DOTHA<sub>2</sub>-PSMA and  $^{68}\text{Ga}$ -PSMA-617 uptake in LNCaP cells

| Predictors                                                                                 | Estimate value of coefficient (95% CI) | T statistic | P value |
|--------------------------------------------------------------------------------------------|----------------------------------------|-------------|---------|
| Effect of time                                                                             | 4.18 (2.59 - 5.77)                     | 5.20        | < 0.001 |
| Injecting $^{68}\text{Ga}$ -PSMA-617 instead of $^{64}\text{Cu}$ -DOTHA <sub>2</sub> -PSMA | -13.82 (-17.93 - -9.12)                | -6.65       | < 0.001 |

Adjusted  $R^2 = 0.397$

95% confidence interval (CI) are estimated for coefficient of predictors based on the model degrees of freedom and coefficient standard error.

**Table S4.** Linear model for  $^{64}\text{Cu}$ -DOTHA<sub>2</sub>-PSMA and  $^{68}\text{Ga}$ -PSMA-617 internalization in LNCaP cells

| Predictors                                                                                 | Estimate value of coefficient (95% CI) | T statistic | P value |
|--------------------------------------------------------------------------------------------|----------------------------------------|-------------|---------|
| Effect of time                                                                             | 4.52 (3.96 - 5.08)                     | 16.02       | < 0.001 |
| Injecting $^{68}\text{Ga}$ -PSMA-617 instead of $^{64}\text{Cu}$ -DOTHA <sub>2</sub> -PSMA | -0.56 (-1.93 - 0.81)                   | -0.81       | 0.42    |

Adjusted  $R^2 = 0.693$

95% confidence interval (CI) are estimated for coefficient of predictors based on the model degrees of freedom and coefficient standard error.

**Table S5.** Linear model for  $^{64}\text{Cu}$ -DOTHA<sub>2</sub>-PSMA and  $^{68}\text{Ga}$ -PSMA-617 efflux in LNCaP cells

| Predictors                                                                                 | Estimate value of coefficient (95% CI) | T statistic | P value |
|--------------------------------------------------------------------------------------------|----------------------------------------|-------------|---------|
| Effect of time                                                                             | -9.17 (-13.55 - -4.79)                 | -4.20       | < 0.001 |
| Injecting $^{68}\text{Ga}$ -PSMA-617 instead of $^{64}\text{Cu}$ -DOTHA <sub>2</sub> -PSMA | 0.41 (-13.42 - 14.42)                  | 0.06        | 0.953   |

Adjusted  $R^2 = 0.235$

95% confidence interval (CI) are estimated for coefficient of predictors based on the model degrees of freedom and coefficient standard error.

**Table S6.** Balb/c mice biodistribution detailed results

| Organs       | <sup>64</sup> Cu-DOTHA <sub>2</sub> -PSMA |               |               |                |                | <sup>68</sup> Ga-PSMA-617 |               |
|--------------|-------------------------------------------|---------------|---------------|----------------|----------------|---------------------------|---------------|
|              | 1h p.i. (n=9)                             | 2h p.i. (n=6) | 4h p.i. (n=6) | 24h p.i. (n=5) | 48h p.i. (n=5) | 1h p.i. (n=4)             | 2h p.i. (n=4) |
| Blood        | 1.47 ± 1.41                               | 1.32 ± 0.47   | 1.54 ± 0.41   | 2.09 ± 1.02    | 1.10 ± 0.23    | 3.27 ± 2.03               | 2.12 ± 1.70   |
| Plasma       | 2.50 ± 1.16                               | 2.60 ± 0.26   | 3.05 ± 1.18   | 2.36 ± 0.31    | 1.57 ± 0.40    | 4.94 ± 3.50               | 1.43 ± 0.37   |
| Adrenals     | 2.13 ± 0.95                               | 3.77 ± 1.27   | 2.13 ± 1.79   | 3.00 ± 1.44    | 2.24 ± 1.03    | 3.49 ± 0.92               | 2.19 ± 0.77   |
| Testis       | 0.65 ± 0.34                               | 1.10 ± 0.11   | 1.20 ± 0.17   | 1.35 ± 0.20    | 0.87 ± 0.13    | -                         | -             |
| Seminal gl.  | 0.79 ± 0.61                               | 0.71 ± 0.14   | 0.65 ± 0.16   | 0.60 ± 0.10    | 0.51 ± 0.14    | -                         | -             |
| Fat          | 0.52 ± 0.36                               | 0.51 ± 0.16   | 0.55 ± 0.24   | 0.69 ± 0.29    | 0.38 ± 0.10    | 0.76 ± 0.16               | 0.29 ± 0.08   |
| Kidneys      | 15.76 ± 7.02                              | 9.07 ± 1.24   | 7.95 ± 1.23   | 8.63 ± 1.27    | 5.25 ± 0.75    | 93.74 ± 26.50             | 32.38 ± 9.52  |
| Spleen       | 2.45 ± 1.71                               | 4.55 ± 2.08   | 3.39 ± 0.82   | 4.00 ± 0.46    | 1.76 ± 0.14    | 2.90 ± 1.20               | 1.16 ± 0.34   |
| Pancreas     | 1.42 ± 1.13                               | 1.86 ± 0.34   | 1.89 ± 0.16   | 1.92 ± 0.19    | 1.43 ± 0.36    | 1.04 ± 0.59               | 0.36 ± 0.09   |
| Liver        | 14.27 ± 12.34                             | 29.87 ± 4.98  | 30.18 ± 4.24  | 26.91 ± 5.12   | 13.74 ± 1.56   | 2.00 ± 1.18               | 0.67 ± 0.16   |
| Heart        | 2.72 ± 2.60                               | 3.63 ± 0.49   | 4.30 ± 0.18   | 4.43 ± 0.30    | 3.69 ± 0.78    | 1.06 ± 0.66               | 0.28 ± 0.09   |
| Lungs        | 4.83 ± 3.71                               | 10.44 ± 2.74  | 8.79 ± 0.44   | 7.14 ± 0.86    | 3.76 ± 0.43    | 3.57 ± 2.41               | 1.76 ± 0.76   |
| Muscles      | 0.70 ± 0.64                               | 0.71 ± 0.22   | 0.65 ± 0.09   | 0.84 ± 0.07    | 0.75 ± 0.23    | 0.57 ± 0.31               | 0.19 ± 0.06   |
| Bone         | 0.91 ± 0.63                               | 1.62 ± 0.69   | 2.32 ± 1.37   | 1.30 ± 0.18    | 0.68 ± 0.14    | 0.52 ± 0.38               | 0.14 ± 0.04   |
| Brain        | 0.19 ± 0.15                               | 0.28 ± 0.04   | 0.32 ± 0.03   | 0.47 ± 0.07    | 0.47 ± 0.07    | 0.11 ± 0.06               | 0.04 ± 0.01   |
| Tail         | 3.77 ± 2.49                               | 2.24 ± 0.50   | 2.37 ± 0.57   | 2.19 ± 1.25    | 0.85 ± 0.25    | 2.69 ± 0.93               | 2.78 ± 1.60   |
| Intestin     | 5.71 ± 4.78                               | 11.27 ± 1.66  | 11.02 ± 0.65  | 6.29 ± 1.84    | 2.67 ± 0.52    | -                         | -             |
| Stomach      | 5.72 ± 5.10                               | 10.58 ± 1.53  | 9.40 ± 0.91   | 4.79 ± 0.79    | 2.82 ± 0.52    | -                         | -             |
| Thyroid      | 2.93 ± 1.87                               | 3.48 ± 0.67   | 4.57 ± 3.46   | 3.18 ± 2.26    | 1.51 ± 0.58    | -                         | -             |
| Salivary gl. | 3.38 ± 2.96                               | 4.40 ± 0.84   | 3.75 ± 0.30   | 3.27 ± 0.53    | 2.13 ± 0.49    | -                         | -             |
| Skin         | 1.26 ± 0.58                               | 1.56 ± 0.33   | 1.35 ± 0.61   | 0.93 ± 0.37    | 0.39 ± 0.03    | -                         | -             |

**Table S7.** Detailed results for PET region-of-interest activity for non-blocked injection of  $^{64}\text{Cu}$ -DOTHA<sub>2</sub>-PSMA

| Organs    | Tumor         | Kidney calyces | Kidney cortex | Liver        | Muscle      |
|-----------|---------------|----------------|---------------|--------------|-------------|
| 0-5 min   | 6.80 ± 1.38   | 45.15 ± 23.84  | 22.79 ± 6.86  | 12.94 ± 3.68 | 2.00 ± 0.56 |
| 5-10 min  | 9.29 ± 2.41   | 49.58 ± 27.77  | 18.32 ± 5.68  | 17.82 ± 6.23 | 2.24 ± 0.66 |
| 10-15 min | 10.23 ± 3.40  | 36.82 ± 28.07  | 15.39 ± 6.00  | 19.33 ± 7.24 | 1.62 ± 0.59 |
| 15-20 min | 10.98 ± 3.50  | 25.36 ± 17.93  | 14.02 ± 7.92  | 20.34 ± 8.34 | 1.57 ± 0.39 |
| 20-25 min | 11.62 ± 3.87  | 21.49 ± 16.94  | 12.89 ± 8.12  | 20.86 ± 8.84 | 1.45 ± 0.53 |
| 25-30 min | 12.17 ± 4.26  | 18.56 ± 16.93  | 12.69 ± 8.69  | 21.29 ± 9.02 | 1.68 ± 0.87 |
| 30-35 min | 12.31 ± 4.35  | 17.22 ± 17.35  | 12.25 ± 8.62  | 21.48 ± 9.10 | 1.38 ± 0.32 |
| 35-40 min | 12.83 ± 4.78  | 16.10 ± 16.00  | 11.88 ± 8.15  | 21.85 ± 9.35 | 1.31 ± 0.44 |
| 40-45 min | 12.98 ± 4.72  | 14.37 ± 14.62  | 11.56 ± 7.82  | 21.91 ± 9.27 | 1.34 ± 0.41 |
| 45-50 min | 13.24 ± 4.94  | 13.38 ± 13.18  | 10.53 ± 7.08  | 22.12 ± 9.35 | 1.21 ± 0.34 |
| 50-55 min | 13.90 ± 5.14  | 12.61 ± 12.19  | 10.44 ± 6.85  | 22.47 ± 9.37 | 1.01 ± 0.35 |
| 55-60 min | 13.96 ± 4.95  | 11.28 ± 10.84  | 9.65 ± 6.34   | 22.42 ± 9.19 | 1.09 ± 0.36 |
| 4 h       | 23.79 ± 11.46 | -              | -             | 26.85 ± 5.35 | 1.11 ± 0.29 |
| 24 h      | 18.55 ± 6.56  | -              | -             | 21.34 ± 3.59 | 1.56 ± 0.54 |

0-1h p.i. non-blocked: n=9, t=14; 4h and 24h p.i. non-blocked: n=6, t=9.

**Table S8.** Detailed results for PET region-of-interest activity for injection of  $^{64}\text{Cu}$ -DOTHA<sub>2</sub>-PSMA blocked with  $^{\text{nat}}\text{Cu}$ -DOTHA<sub>2</sub>-PSMA

|           | Tumor       | Kidney calyces | Kidney cortex | Liver        | Muscle      |
|-----------|-------------|----------------|---------------|--------------|-------------|
| 0-5 min   | 4.08 ± 1.32 | 61.33 ± 13.19  | 18.43 ± 1.48  | 10.48 ± 0.87 | 1.58 ± 0.49 |
| 5-10 min  | 4.42 ± 1.19 | 25.22 ± 4.78   | 9.65 ± 0.85   | 15.12 ± 1.01 | 1.34 ± 0.31 |
| 10-15 min | 4.50 ± 1.03 | 16.22 ± 5.12   | 7.69 ± 1.04   | 17.33 ± 1.04 | 0.87 ± 0.05 |
| 15-20 min | 4.33 ± 0.97 | 10.32 ± 1.40   | 6.95 ± 1.28   | 18.66 ± 1.38 | 1.06 ± 0.17 |
| 20-25 min | 4.66 ± 1.01 | 7.14 ± 1.59    | 6.51 ± 0.87   | 18.84 ± 1.07 | 0.83 ± 0.35 |
| 25-30 min | 4.30 ± 0.89 | 6.64 ± 2.11    | 6.29 ± 1.25   | 19.42 ± 1.21 | 0.74 ± 0.18 |
| 30-35 min | 4.43 ± 1.05 | 6.53 ± 1.99    | 6.30 ± 0.92   | 19.80 ± 1.62 | 0.69 ± 0.17 |
| 35-40 min | 4.62 ± 1.16 | 5.81 ± 1.62    | 5.52 ± 0.60   | 19.82 ± 1.44 | 1.08 ± 0.48 |
| 40-45 min | 4.68 ± 1.25 | 6.38 ± 2.05    | 5.71 ± 0.54   | 20.31 ± 1.86 | 0.78 ± 0.28 |
| 45-50 min | 4.73 ± 1.06 | 5.18 ± 1.03    | 6.12 ± 1.32   | 20.16 ± 1.42 | 1.14 ± 0.34 |
| 50-55 min | 4.80 ± 0.99 | 5.20 ± 1.29    | 5.58 ± 0.76   | 20.68 ± 1.58 | 0.81 ± 0.30 |
| 55-60 min | 4.79 ± 0.96 | 5.22 ± 1.53    | 5.83 ± 0.88   | 20.29 ± 1.72 | 0.83 ± 0.21 |
| 4 h       | 7.46 ± 1.08 | -              | -             | 19.95 ± 3.11 | 0.97 ± 0.14 |
| 24 h      | 8.62 ± 0.74 | -              | -             | 11.07 ± 1.89 | 0.65 ± 0.10 |

n=3, t=6

**Table S9.** Linear model for  $^{64}\text{Cu}$ -DOTHA<sub>2</sub>-PSMA tumor uptake in dynamic PET

| Predictors            | Estimate value of coefficient (95% CI) | T statistic | P value |
|-----------------------|----------------------------------------|-------------|---------|
| Effect of time        | 0.08 (-0.18 - 0.34)                    | 5.98        | < 0.001 |
| Non blocked injection | 7.17 (6.19 - 8.15)                     | 14.41       | < 0.001 |

Adjusted R<sup>2</sup> = 0.503

95% confidence interval (CI) are estimated for coefficient of predictors based on the model degrees of freedom and coefficient standard error.

**Table S10.** Tumor-to-organs of interest ratios for  $^{64}\text{Cu}$ -DOTHA<sub>2</sub>-PSMA PET imaging

| Ratios                 | 1h p.i.              | 4h p.i.               | 24h p.i.             |
|------------------------|----------------------|-----------------------|----------------------|
| Tumor-to-muscle        | 12.78 (8.58 – 19.26) | 21.34 (12.10 – 35.43) | 11.86 (7.15 – 20.16) |
| Tumor-to-kidney cortex | 1.45 (0.82 – 3.00)   | -                     | -                    |
| Tumor-to-liver         | 0.62 (0.40 – 1.01)   | 0.89 (0.52 – 1.24)    | 0.87 (0.59 – 1.24)   |

95% confidence intervals on region-of-interest signals were used to calculate the intervals on ratios.

**Table S11.** Tumor bearing NRG mice biodistribution detailed results

| Organs       | Non-blocked (n=11) | Blocked (n=4) |
|--------------|--------------------|---------------|
| Blood        | 3.46 ± 1.61        | 1.91 ± 0.30   |
| Plasma       | 4.52 ± 1.99        | 2.54 ± 0.14   |
| Adrenals     | 4.70 ± 3.15        | 9.02 ± 11.94  |
| Testis       | 1.96 ± 0.68        | 1.03 ± 0.10   |
| Seminal gl.  | 1.13 ± 0.49        | 0.59 ± 0.05   |
| Fat          | 0.63 ± 0.23        | 0.26 ± 0.02   |
| Kidneys      | 13.24 ± 4.92       | 6.86 ± 0.20   |
| Spleen       | 10.10 ± 6.38       | 6.99 ± 3.36   |
| Pancreas     | 2.80 ± 0.89        | 2.09 ± 0.60   |
| Liver        | 28.54 ± 12.44      | 15.15 ± 2.93  |
| Heart        | 5.20 ± 2.05        | 3.00 ± 0.18   |
| Lungs        | 14.30 ± 5.78       | 5.99 ± 0.15   |
| Muscles      | 1.10 ± 0.56        | 0.47 ± 0.05   |
| Bone         | 2.38 ± 2.01        | 0.91 ± 0.11   |
| Brain        | 0.75 ± 0.31        | 0.38 ± 0.03   |
| Tail         | 2.37 ± 0.87        | 1.36 ± 0.20   |
| Intestin     | 15.69 ± 7.36       | 8.53 ± 1.04   |
| Stomach      | 9.17 ± 3.26        | 5.55 ± 0.19   |
| Thyroid      | 2.57 ± 0.91        | 1.33 ± 0.28   |
| Salivary gl. | 4.18 ± 1.78        | 1.84 ± 0.05   |
| Skin         | 1.07 ± 0.54        | 0.50 ± 0.18   |
| LNCaP tumor  | 17.33 ± 8.37       | 7.44 ± 2.31   |

\* Variation on ratios is minimum and maximum calculated from 95% confidence interval.
